# Supplementary material for: H3S10ph broadly marks early-replicating domains in interphase ESCs and shows reciprocal antagonism with H3K9me2
Source: HighWire-hosted journal article supplement (doi:10.1101/gr.224717.117), 2017-12-11
Supplement: Supplemental_Materials.docx [file Supplemental_Materials.docx]

## Supplemental Materials

## H3S10ph broadly marks early-replicating domains in interphase ESCs and shows reciprocal antagonism with H3K9me2

**Running Title:** H3S10ph marks euchromatin in interphase ESCs

*Carol CL Chen, Preeti Goyal, Mohammad M. Karimi, Marie H. Abildgaard, Hiroshi Kimura, and Matthew C. Lorincz*

## SUPPLEMENTAL METHODS

## *Native chromatin immunoprecipitation (NChIP)*

NChIP-seq were performed as previously described, with minor modifications. To generate chromatin, 107 cells were trypsinized, washed in PBS and flash frozen. Cells were resuspended in 250μL of douncing buffer (10mM Tris-HCl pH 7.5, 4mM MgCl2, 1mM CaCl2, 1x protease inhibitory cocktail or PIC) and homogenized through a 25-gauge needle syringe for 25 repetitions. Subsequently, 1.25μL of 50U/mL of MNase was added to the nuclei and incubated at 37°C for 7 minutes. The reaction was quenched by the addition of 0.5M EDTA and incubation on ice for 5 minutes. 1mL of hypotonic lysis buffer (0.2mM EDTA pH 8.0, 0.1mM benzamidine, 0.1mM phenylmethylsufonyl fluoride, 1.5mM dithiothreitol, 1x PIC) was then added and the mix incubated with rotation for 1h at 4°C. Protein A/G Dynabeads (Life Technologies) were mixed and washed twice with 1mL of IP buffer (10mM Tris-HCl pH 8.0, 1% Triton X-100, 0.1% Deoxycholate, 0.1% SDS, 90mM NaCl, 2mM EDTA, 1x PIC), and then resuspended in the original volume with IP buffer. Cellular debris was pelleted and the soluble chromatin fraction were then precleared by rotation with Protein A/G Dynabeads for 2 h at 4°C. 100μL of the pre-cleared chromatin was purified by phenol:chloroform extraction and fragment sizes were analyzed on a 1.5% agarose gel.

Antibody-bead complexes were prepared using antibodies specific for H3K9me2 (Abcam ab1220, 5μL), H3K4me3 (Abcam ab1012, 5μL), H3K36me3 (Abcam ab9050, 5μL), and YFP (Abcam ab290, 5μL) incubated with Protein A/G dynabeads at an antibody:bead ratio of 1:4, in IP buffer at 4°C, rotating for 2 h. 106 cell equivalents of chromatin was then added to each antibody-bead complex aliquot and rotated overnight at 4°C. The immunoprecipitated complex were then washed twice with 400μL of ChIP wash buffer (20mM Tris-HCl pH 8.0, 0.1% SDS, 1% Triton X-100, 2mM EDTA, 150mM NaCl, 1x PIC), followed by a single wash with ChIP final wash buffer (20mM Tris-HCl pH 8.0, 0.1% SDS, 1% Triton X-100, 2mM EDTA, 500mM NaCl). The protein-DNA complex was eluted by incubating the beads in 200μL of elution buffer (100mM NaHCO3, 1% SDS) and RNAse at 68°C for 2 h. Beads were then washed and eluted in the presence of RNase A. DNA was then purified with 2x volume of phenol:choloroform:isoamyl (25:24:1) in MaXtract High Density phase-locked tubes (Qiagen) and ethanol precipitated at -20°C overnight. DNA pellets were washed 2x with 70% ethanol, and resuspended in 60μL ddH2O.

### Crosslinked MNase ChIP

For crosslink MNase ChIP of H3S10ph, 107 ES cells were harvested and crosslinked with 1% formaldehyde in 10mL of PBS for 10 minutes at room temperature then quenched with 0.125M glycine for 5 minutes. Cells were washed 1x with PBS, and resuspended in 1mL of EZ Nuclei Isolation Buffer (Sigma). The cytoplasmic supernatant was discarded and the pellet containing nuclei were flash frozen with liquid N2. Nuclei were washed once with MNase Wash buffer (50mM Tris pH 8.0, 1.5mM DTT, 1mM PMSF, and 1x Protease Inhibitor Cocktail (Roche)) and resuspended in MNase Digestion Buffer (10mM Tris-Cl pH 7.5, 4mM MgCl2, 1mM CaCl2, 1mM PMSF and 1x PIC). Chromatin was then digested with micrococcal nuclease (NEB) and incubated at 37°C for 7 minutes, yielding predominantly mononucleosomes. The MNase digestion was quenched with the addition of EDTA to a final concentration of 10mM. Nuclei were then lysed with 1mL of IP Buffer (0.5% NP-40, 0.1% NaDOC, 0.1% SDS, 150mM NaCl, 10mM EDTA, 1mM PMSF and 1x PIC) at 4°C on a rotator for 1 h. Cell debris were then pelleted, and the soluble chromatin fraction was precleared with Protein A/G Dynabeads (Life Technologies) at 4°C, rotating for 2 h. During preclearing, antibody-bead complexes were prepared using antibodies specific for H3S10ph (clone CMA311) and incubated with sheep anti-mouse IgG dynabeads, in IP buffer at 4°C, on a rotator for 2 h. 106 cell equivalents of chromatin was then added to each antibody-bead complex, and rotated overnight. Beads were then washed and eluted in the presence of RNAse A. To reverse crosslinking, eluted DNA was incubated with Proteinase K and high salt overnight at 65°C. DNA was then purified with 2x volume of phenol:choloroform:isoamyl (25:24:1) in MaXtract High Density phase-locked tubes (Qiagen) and ethanol precipitated at -20°C overnight. DNA pellets were washed two times with 70% ethanol, and resuspended in 60μL ddH2O.

### ChIP-seq library construction and bioinformatic analysis

Construction of Illumina sequencing libraries was as described previously (Brind'Amour et al. 2015). Briefly, ChIP and input DNA (10-20ng total) was subjected to end repair with T4 and Klenow, A-tailing, and adaptor ligation. Following ligation, libraries were amplified (8-10 PCR cycles) using primers complementary to the adaptors. PCR products in the range of 200-700 bp was then purified on a 2% EX Gel (Life Technologies) and quantified on a Qubit and Agilent Tape station. Paired-end sequencing was performed on an Illumina Hi-Seq 2000 following the recommended protocol. Reads were aligned to mm9 using Burrows-Wheeler Aligner (BWA) using default parameters. PCR duplicates and multi-match reads (Q=0) were removed from all subsequent statistical analyses. Wiggle plots were generated from genome coverage counts using reads of MAPQ > 5. RPKM (Reads Per Kilobase per Million mapped reads) and z-score values were calculated using the equations below as per Karimi et al. (Karimi et al. 2011) with SeqMonk and VisRSeq (Younesy et al. 2015) software.

To quantify expression levels and histone marks we calculated RPKM values. For each genomic region of interest, RPKM was calculated using the following formula: , where *n* is number or reads aligned to the region, *L* is the length in kilobases, and *Nx* is the total number of aligned reads used for normalization. For pair-wise sample comparisons, an empirical Z-score was calculated assuming the distribution of RPKMs for each sample followed a Poisson model:

where RPKMA and RPKMB are RPKMs in the region of interest of A and B samples respectively. H3S10ph ChIP-seq data was normalized by subtracting input RPKM from ChIP RPKM values, z-scores were calculated from the normalized score. Gene Ontology enrichment was performed using InnateDB (Breuer et al. 2012) or PantherDB (Mi et al. 2017). Kendall correlation was performed by ranking all genomic 5kb bins by RPKM values and comparing the ranks of chromatin features, followed by unsupervised clustering to generate the correlation matrix. Data visualization and plots were generated in VisRSeq (Younesy et al. 2015), Excel or RStudio.

***RNA-seq***

Strand-specific mRNA-seq libraries were constructed from purified polyA RNA, as described in Morrissy et al.

(Morrissy et al. 2016), from 6ug of DNAse1 treated total RNA and sequenced on an Illumina Genome Analyzeriix following the manufactures recommended protocol. The resulting sequence reads were aligned to the mouse reference genome (mm9) using MAQ v0.7.1 (Li et al. 2009), with Smith-Waterman alignment disabled and annotated exon-exon junctions compiled from Ensembl v54 (Flicek et al. 2009), RefSeq (Pruitt & Maglott 2001) and UCSC (Rhead et al. 2009) gene annotation sources (downloaded from http://genome.ucsc.edu on March 17, 2009), as described (Karimi et al. 2011). Sequence reads that could be uniquely assigned a position in the transcript resource (exon-exon junctions) were computationally repositioned to the genomic mm9 coordinates and a single merged bam file generated for downstream analyses. The Samtools pileup utility was used to generate data tracks for visualization (wig and bigWig (Kent et al. 2010)) in the UCSC browser. Repbase (Jurka et al. 2005), a comprehensive database of repetitive elements, was used for alignment of reads to specific repetitive elements.

## SUPPLEMENTAL REFERENCES

Breuer, K. et al., 2012. InnateDB: systems biology of innate immunity and beyond--recent updates and continuing curation. *Nucleic Acids Research*.

Brind'Amour, J. et al., 2015. An ultra-low-input native ChIP-seq protocol for genome-wide profiling of rare cell populations. *Nature Communications*, 6, p.6033.

Elsässer, S.J. et al., 2015. Histone H3.3 is required for endogenous retroviral element silencing in embryonic stem cells. *Nature*, 522(7555), pp.240–244.

Fang, T.C. et al., 2012. Histone H3 lysine 9 di-methylation as an epigenetic signature of the interferon response. *Journal of Experimental Medicine*.

Flicek, P. et al., 2009. Ensembl's 10th year. *Nucleic Acids Research*, 38(suppl_1), pp.D557–D562.

Hiratani, I. et al., 2010. Genome-wide dynamics of replication timing revealed by in vitro models of mouse embryogenesis. *Genome Research*, 20(2), pp.155–169.

Jurka, J. et al., 2005. Repbase Update, a database of eukaryotic repetitive elements. *Cytogenetic and Genome Research*, 110(1-4), pp.462–467.

Karimi, M.M. et al., 2011. DNA methylation and SETDB1/H3K9me3 regulate predominantly distinct sets of genes, retroelements, and chimeric transcripts in mESCs. *Cell Stem Cell*, 8(6), pp.676–687.

Kent, W.J. et al., 2010. BigWig and BigBed: enabling browsing of large distributed datasets. *Bioinformatics*, 26(17), pp.2204–2207.

Li, H. et al., 2009. The Sequence Alignment/Map format and SAMtools. *Bioinformatics*, 25(16), pp.2078–2079.

Mi, H. et al., 2017. PANTHER version 11: expanded annotation data from Gene Ontology and Reactome pathways, and data analysis tool enhancements. *Nucleic Acids Research*, 45(D1), pp.D183–D189.

Mikkelsen, T.S. et al., 2007. Genome-wide maps of chromatin state in pluripotent and lineage-committed cells. *Nature*, 448(7153), pp.553–560.

Morrissy, A.S. et al., 2016. Divergent clonal selection dominates medulloblastoma at recurrence. *Nature*, 529(7586), pp.351–357.

Peric-Hupkes, D. et al., 2010. Molecular Maps of the Reorganization of Genome-Nuclear Lamina Interactions during Differentiation. *Molecular cell*, 38(4), pp.603–613.

Pruitt, K.D. & Maglott, D.R., 2001. RefSeq and LocusLink: NCBI gene-centered resources. *Nucleic Acids Research*, 29(1), pp.137–140.

Rhead, B. et al., 2009. The UCSC Genome Browser database: update 2010. *Nucleic Acids Research*, 38(Database), pp.D613–D619.

Yokochi, T. et al., 2009. G9a selectively represses a class of late-replicating genes at the nuclear periphery. *Proceedings of the National Academy of Sciences*, 106(46), pp.19363–19368.

Younesy, H. et al., 2015. VisRseq: R-based visual framework for analysis of sequencing data. *BMC bioinformatics*, 16 Suppl 11(Suppl 11), p.S2.

Yue, F. et al., 2014. A comparative encyclopedia of DNA elements in the mouse genome. *Nature*, 515(7527), pp.355–364.

SUPPLEMENTAL FIGURE LEGENDS

Figure S1. Genome-wide characterization of cell-cycle-specific H3S10ph.

**A.** Flow cytometry analysis of ESCs stably transfected with hCDT1-mKO and hGEMININ-Venus FUCCI constructs. Gates for G1, S and S-G2-M fractions are shown, along with the percentage of cells in each fraction. Histograms of DNA content based on Hoescht 33342 staining is also shown for each gated fraction. **B.** Fluorescence microscopy of FUCCI ESCs showing CDT1-mKO2 (red) and GEMN-Venus (green) fluorescence, counterstained with Hoescht 33342 (white). Arrows highlight mitotic cells with condensed chromosomes expressing GEMN-Venus. **C.** Analysis of the size distribution of unamplified DNA following H3S10ph ChIP of G1, S and S-G2-M fractions isolated by cell sorting using FUCCI fluorescence. DNA was quantitated using capillary electrophoresis. **D.** H3S10ph ChIP-qPCR of amplicons specific for the *Sox2* promoter, an IAP LTR on Chromosome 2 (chr2) and an intergenic region on chr2 (primer sequences available upon request). Enrichment levels were normalized to total input DNA. ChIP with mIgG was conducted in parallel as a negative control. **E.** H3S10ph enrichment (RPKM) versus matched input DNA genome-wide (5kb bins). R2: Pearson correlation coefficient. **F.** Box and whisker plot of cell cycle specific H3S10ph enrichment (RPKM, normalized to input) genome-wide (1kb bins), at: all gene bodies and non-genic Long Terminal Repeat (LTR) or LINE retrotransposons. H3S10ph preferentially marks gene bodies at all cell-cycle stages, including in G1. **G.** The percentage of genomic regions (5kb bins) that overlap a DHS (darker color) in regions with constitutive H3S10ph (outer ring) versus regions with cell cycle skewing of H3S10ph (inner ring) is shown. Cell cycle skewing fractions of H3S10ph in G1, S, or S/G2/M are presented in red, yellow and green, respectively. Regions that show cell cycle-variable H3S10ph are significantly overrepresented for DNAseHS sites compared to constitutively marked regions (chi-square test, *p* < 0.0001). **H.** Genome-browserscreenshot of the *Pcgf1* locus and flanking genes. Input corrected H3S10ph tracks for G1, S and S-G2-M fractions are shown, as well as strand-specific RNA-seq, revealing broad enrichment of H3S10ph in intergenic regions as well as over gene-bodies of actively transcribing genes. Boxed regions highlight DNaseHS sites (Yue et al. 2014) that exhibit dynamic H3S10ph enrichment during the cell cycle. **I.** Biological Process ontology analysis of genes physically interacting with an enhancer that is skewed for cell cycle specific H3S10ph identified as in Fig. 1H.

***Figure S2. Interphase H3S10ph is not dependent on Aurora kinase B*.**

**A.** Flow cytometry analysis of control (DMSO) and Hesp-treated ESCs stained with H3S10ph and Hoechst 33342. The percentage of interphase and mitotic cells, as determined by H3S10ph staining and DNA content, is shown. Note the absence of H3S10ph+ mitotic cells in the Hesp-treated sample, as expected following treatment with this AURKB-specific inhibitor. **B.** Western analysis of H3S10ph and H3 (loading control) in ESCs treated with DMSO (vehicle control) or 200nm Hesperadin for 3 h. Levels of each were quantitated using the Odyssey imager (LICOR) and the ratio of H3S10ph/H3 signal is presented, normalized to 1.0 for the untreated control. TRIM28 serves as a loading control. **C.** Comparison of enrichment of H3S10ph (Input subtracted RPKM) over all gene bodies in Hesp-treated ESCs versus asynchronous (Ctrl) or G1-sorted FUCCI ESCs. **D.** Immunofluorescence analysis of WT TT2 ESCs stained with H3S10ph (red), PCNA (green), and Hoechst 33342 (blue). Note that a subset of interphase cells are negative for the S-phase marker PCNA while still showing positive H3S10ph staining.

Figure S3. Overexpression of H3S10A in ESCs promotes H3K9me2 accumulation in early-replicating regions.

**A.** Schematic of Dox inducible system for induction of H3.3-YFP (WT) or H3.3S10A-YFP. **B.** Live fluorescence imaging of ESC clones expressing H3.3-YFP and H3.3(S10A)-YFP. **C.** Flow cytometry analysis of YFP expression in WT, S10A.1 and S10A.2 lines with or without Dox induction. The percentage of GFP+ cells is shown for each condition. H3.3S10A is incorporated at higher levels than WT H3.3. Greater heterogeneity in expression was observed in the clonal S10A.1 mutant line than the S10A.2 or WT H3.3 lines. **D.** Scatterplot of ChIP-seq data (5kb bins) showing enrichment of H3.3-YFP in WT versus S10A.2 expressing lines, with enrichment of H3.3-YFP in the clonal S10A.1 line overlaid in heat map format. **E.** Scatterplot comparing the genome-wide change in H3K9me2 (z-score) in the S10A.1 line versus H3K9me2 levels (RPKM) in WT cells. Both S10A clones show increased H3K9me2 at regions that are relatively H3K9me2-poor in WT ESCs. **F.** Scatterplot of YFP incorporation levels versus the change in H3K9me2 enrichment in the S10A.1 line (z-score). Note that accumulation of H3K9me2 as a direct result of incorporating H3S10A occurs primarily at regions that are normally H3S10ph-rich.

Figure S4. EHMT1-mediated H3K9me2 restricts H3K4me3 deposition and prevents aberrant activation of promoters proximal to TTRs.

**A.** Genes aberrantly transcribed in *Ehmt2-/-* and *Ehmt1-/-*ESCs are significantly enriched (chi-square, *p* < 0.001) at TTRs, with skew for asymmetrical orientation relative to the expected frequency in the mouse genome. **B.** Genome browser screenshot of the *Gata3 – Sfmbt2 locus* showing H3S10ph (Hesp-treated), H3K4me3, H3K36me3and strand-specific RNA-seq tracks in WT, *Ehmt1*-/- and *Ehmt2*-/- ESCs. **C.** Meta-profile of thedistribution of H3K36me3 around transcription termination sites (TTS +/- 1kb) in WT, *Ehmt1*-/- and *Ehmt2*-/- ESCs. Note that H3K36me3 levels are not increased downstream of the TTS, indicating that transcription run-through events are not prevalent in the mutant lines. **D.** Profiles of H3K4me3 enrichment around transcription start sites in WT, *Ehmt1*-/- and *Ehmt2*-/- ESCs. Class I includes H3K4me3 peaks that are common in all three lines (All), Class II includes sites that show higher enrichment for H3K4me3 in *Ehmt1*-/- and *Ehmt2*-/- than in WT cells (Gained) and Class III includes H3K4me3 peaks that are present in *Ehmt1*-/- and *Ehmt2*-/- cells, but are absent in WT ESCs (*De novo*). **E.** Heat maps of H3K4me3, replication timing (RT) (Yokochi et al. 2009) and strand-specific RNA-seq centered in each subpanel on the 1,081 *de novo* H3K4me3 sites (+/- 5 kb). Note the clear increase in RNA-seq coverage downstream or upstream of the *de novo* H3K4me3 peak in the + strand and - strand heat maps, respectively. **F.**Genomic features overlapping with the 3 classes of H3K4me3 peaks. Note that *de novo* H3K4me3 peaks predominantly fall within LTR and LINE repeats. **G.** Box and whisker plot showing distance, in base pairs (bp) to the closest RT boundary for each of the three H3K4me3 classes. D*e novo* H3K4me3 sites are found closer to RT boundaries than All and Gained sites.

Figure S5. H3S10ph is enriched in gene-rich regions in interphase MEFs, but not as broad domains.

**A.** H3S10ph enrichment (input subtracted RPKM) in gene bodies in Hesp-treated MEFs versus asynchronous (Ctrl) MEFs. Note that Hesp-treatment increases interphase H3S10ph ChIP sensitivity in these regions by over 2-fold (linear regression slope). **B.** Genome-wide scatterplot of RT (100kb tiled bins) in MEFs versus ESCs (Hiratani et al. 2010), overlaid with a heatmap showing Hesp-treated H3S10ph enrichment in both cell types. Regions replicating early in both cell types are also marked with H3S10ph in interphase in both cell types, while regions that are early-replicating exclusively in MEFs are not marked with H3S10ph in interphase in either cell type. **C.** Kendall correlation matrix of H3S10ph in MEFs with chromatin features across 5kb genomic bins, following unsupervised hierarchical clustering. **D**. Genome browser screenshot of a gene-rich, early replicating region showing H3S10ph tracks (control and Hesp-treated) as well as other chromatin features in MEFs. **E.** Genome-wide (5kb tiled bins) pairwise comparison of H3K9me2 enrichment (RPKM) in MEFs (ChIP-seq data from Fang et al. 2012) versus ESCs, overlaid with a heat map of replication timing (RT) in MEFs. Note that regions showing an H3K9me2 enrichment bias in MEFs are generally early-replicating in MEFs.

Supplemental Tables

Supplemental Table 1. H3S10ph (CMA311) antibody specificity as tested by histone H3 peptide ELISA.

Supplemental Table 2. Published datasets used for meta-epigenomic analysis used in Kendall correlation matrix (Fig. 2C).
