# Supplementary material for: H3S10ph broadly marks early-replicating domains in interphase ESCs and shows reciprocal antagonism with H3K9me2
Source: HighWire-hosted journal article supplement (doi:10.1101/gr.224717.117), 2017-12-11
Supplement: Supplemental_Table_S1.xlsx [file Supplemental_Table_S1.xlsx]

## Sheet: Heatmap
CMA311 Histone Peptide ELISA
Dilution Factor	300	900	2700	8100	24300	72900	218700	656100
H3T3ph	0.078	0.068	0.057	0.052	0.051	0.05	0.05	0.047	ELISA Signal		0.5
H3 (1-20)	0.071	0.059	0.055	0.055	0.055	0.054	0.052	0.05
H3K9me1	0.06	0.058	0.057	0.053	0.055	0.051	0.05	0.048
H3K9me2	0.051	0.051	0.051	0.051	0.051	0.051	0.048	0.049			0.07
H3K9me3	0.059	0.058	0.053	0.053	0.053	0.055	0.051	0.05
H3K9ac	0.051	0.051	0.053	0.051	0.049	0.048	0.049	0.05
H3S10ph	0.488	0.364	0.262	0.145	0.098	0.075	0.067	0.059			0.05
H3K9me1S10ph	0.514	0.403	0.266	0.171	0.114	0.092	0.073	0.062
H3K9me2S10ph	0.459	0.344	0.253	0.14	0.091	0.071	0.062	0.059
H3K9me3S10ph	0.055	0.052	0.051	0.05	0.05	0.049	0.049	0.048
H3K9acS10ph	0.262	0.154	0.11	0.079	0.064	0.059	0.054	0.052
H3K9acK14ac	0.058	0.058	0.056	0.055	0.054	0.054	0.055	0.052
H3K14ac	0.107	0.073	0.061	0.057	0.056	0.053	0.049	0.05
H3 (21-31)	0.062	0.058	0.057	0.056	0.053	0.053	0.052	0.051
H3K27me1	0.058	0.056	0.055	0.055	0.06	0.053	0.051	0.053
H3K27me2	0.057	0.053	0.051	0.052	0.053	0.054	0.052	0.051
H3K27me3	0.058	0.059	0.056	0.055	0.055	0.05	0.052	0.051
H3K27ac	0.052	0.051	0.049	0.049	0.05	0.051	0.049	0.049
H3S28ph	0.135	0.084	0.065	0.054	0.05	0.051	0.051	0.047
H3K27me1S28ph	0.064	0.055	0.053	0.05	0.05	0.047	0.053	0.047
H3K27me2S28ph	0.053	0.05	0.051	0.049	0.054	0.049	0.049	0.047
H3K27me3S28ph	0.05	0.051	0.049	0.048	0.048	0.049	0.048	0.048
H3K27acS28ph	0.05	0.05	0.049	0.049	0.049	0.052	0.047	0.048

## Sheet: Rawdata
CMA311
Column1	H3T3ph	H3(1-20)	H3K9me1	H3K9me2	H3K9me3	H3K9ac	H3S10ph	H3K9me1S10ph	H3K9me2S10ph	H3K9me3S10ph	H3K9acS10ph	H3K9acK14ac	H3K14ac	H3(21-31)	H3K27me1	H3K27me2	H3K27me3	H3K27ac	H3S28ph	H3K27me1S28ph	H3K27me2S28ph	H3K27me3S28ph	H3K27acS28ph
300	0.078	0.071	0.06	0.051	0.059	0.051	0.488	0.514	0.459	0.055	0.262	0.058	0.107	0.062	0.058	0.057	0.058	0.052	0.135	0.064	0.053	0.05	0.05
900	0.068	0.059	0.058	0.051	0.058	0.051	0.364	0.403	0.344	0.052	0.154	0.058	0.073	0.058	0.056	0.053	0.059	0.051	0.084	0.055	0.05	0.051	0.05
2700	0.057	0.055	0.057	0.051	0.053	0.053	0.262	0.266	0.253	0.051	0.11	0.056	0.061	0.057	0.055	0.051	0.056	0.049	0.065	0.053	0.051	0.049	0.049
8100	0.052	0.055	0.053	0.051	0.053	0.051	0.145	0.171	0.14	0.05	0.079	0.055	0.057	0.056	0.055	0.052	0.055	0.049	0.054	0.05	0.049	0.048	0.049
24300	0.051	0.055	0.055	0.051	0.053	0.049	0.098	0.114	0.091	0.05	0.064	0.054	0.056	0.053	0.06	0.053	0.055	0.05	0.05	0.05	0.054	0.048	0.049
72900	0.05	0.054	0.051	0.051	0.055	0.048	0.075	0.092	0.071	0.049	0.059	0.054	0.053	0.053	0.053	0.054	0.05	0.051	0.051	0.047	0.049	0.049	0.052
218700	0.05	0.052	0.05	0.048	0.051	0.049	0.067	0.073	0.062	0.049	0.054	0.055	0.049	0.052	0.051	0.052	0.052	0.049	0.051	0.053	0.049	0.048	0.047
656100	0.047	0.05	0.048	0.049	0.05	0.05	0.059	0.062	0.059	0.048	0.052	0.052	0.05	0.051	0.053	0.051	0.051	0.049	0.047	0.047	0.047	0.048	0.048
