# Supplementary material for: H3S10ph broadly marks early-replicating domains in interphase ESCs and shows reciprocal antagonism with H3K9me2
Source: HighWire-hosted journal article supplement (doi:10.1101/gr.224717.117), 2017-12-11
Supplement: Supplemental_Table_S2.xlsx [file Supplemental_Table_S2.xlsx]

## Sheet: CHEN
Cell Type	Cell Line	Treatment	ChIP / RNA	GEO Accesion#
ESC	Fucci TT2	G1	H3S10ph
ESC	Fucci TT2	G1	Input
ESC	Fucci TT2	S	H3S10ph
ESC	Fucci TT2	S	Input
ESC	Fucci TT2	S/G2/M	H3S10ph
ESC	Fucci TT2	S/G2/M	Input
ESC	TT2	Ctrl	H3S10ph
ESC	TT2	Ctrl	Input
ESC	TT2	Hesperadin 200nm, 3h	H3S10ph
ESC	TT2	Hesperadin 200nm, 3h	Input
ESC	H3.3YFP WT		YFP
ESC	H3.3YFP WT		H3K9me2
ESC	H3.3S10A.1		YFP
ESC	H3.3S10A.1		H3K9me2
ESC	H3.3S10A.2		YFP
ESC	H3.3S10A.2		H3K9me2
ESC	TT2		H3K9me2
ESC	Cd12		H3K9me2
ESC	Cd12	Hesperadin 200nm, 3h	H3S10ph
ESC	Cd12	Hesperadin 200nm, 3h	Input
ESC	TT2		mRNA
ESC	Cd12		mRNA
ESC	2-3		mRNA
MEF		Ctrl	H3S10ph
MEF		Ctrl	Input
MEF		Hesperadin 200nm, 3h	H3S10ph
MEF		Hesperadin 200nm, 3h	Input

## Sheet: GEO
Cell Type	ChIP / RNA	GEO Accesion #	Citation
ESC	CTCF	GSM918748	Yue, 2014
ESC	DNAse HS	GSM1014154	Yue, 2014
ESC	H3.3-HA	GSM1429928	Elsasser, 2015
ESC	H3K27ac	GSM1000126	Yue, 2014
ESC	H3K27me3	GSM307619	Mikkelsen, 2008
ESC	H3K36me3	GSM1000125	Yue, 2014
ESC	H3K4me1	GSM1000121	Yue, 2014
ESC	H3K4me3	GSM1000124	Yue, 2014
ESC	H3K9ac	GSM1000123	Yue, 2014
ESC	H3K9me3	GSM1551524	Brind'Amour, 2015
ESC	Lamin B1	GSM426758	Peric-Hupkes, 2010
ESC	mRNA	GSM929718	Yue, 2014
ESC	p300	GSM918750	Yue, 2014
ESC	Pol II	GSM918749	Yue, 2014
ESC	RT	GSM450274	Hiratani, 2010
MEF	CTCF	GSM918743	Yue, 2014
MEF	H3K27ac	GSM1000139	Yue, 2014
MEF	H3K27me3	GSM307609	Mikkelsen, 2008
MEF	H3K36me3	GSM307610	Mikkelsen, 2008
MEF	H3K4me3	GSM307608	Mikkelsen, 2008
MEF	H3K9me2	GSM887877	Fang, 2013
MEF	H3K9me3	GSM307611	Mikkelsen, 2008
MEF	H3Kme1	GSM769028	Yue, 2014
MEF	Lamin B1	GSM426764	Peric-Hupkes, 2010
MEF	mRNA	GSM929719	Yue, 2014
MEF	Pol II	GSM918761	Yue, 2014
MEF	RT	GSM450291	Hiratani, 2010
