# Supplementary figures and images for: H3S10ph broadly marks early-replicating domains in interphase ESCs and shows reciprocal antagonism with H3K9me2
Source: PubMed Central journal article supplement — Genome Res. 2018 Jan;28(1):37–51. doi: 10.1101/gr.224717.117 (PMC5749181; doi:10.1101/gr.224717.117), 2018-01

# Supplemental Figure 1

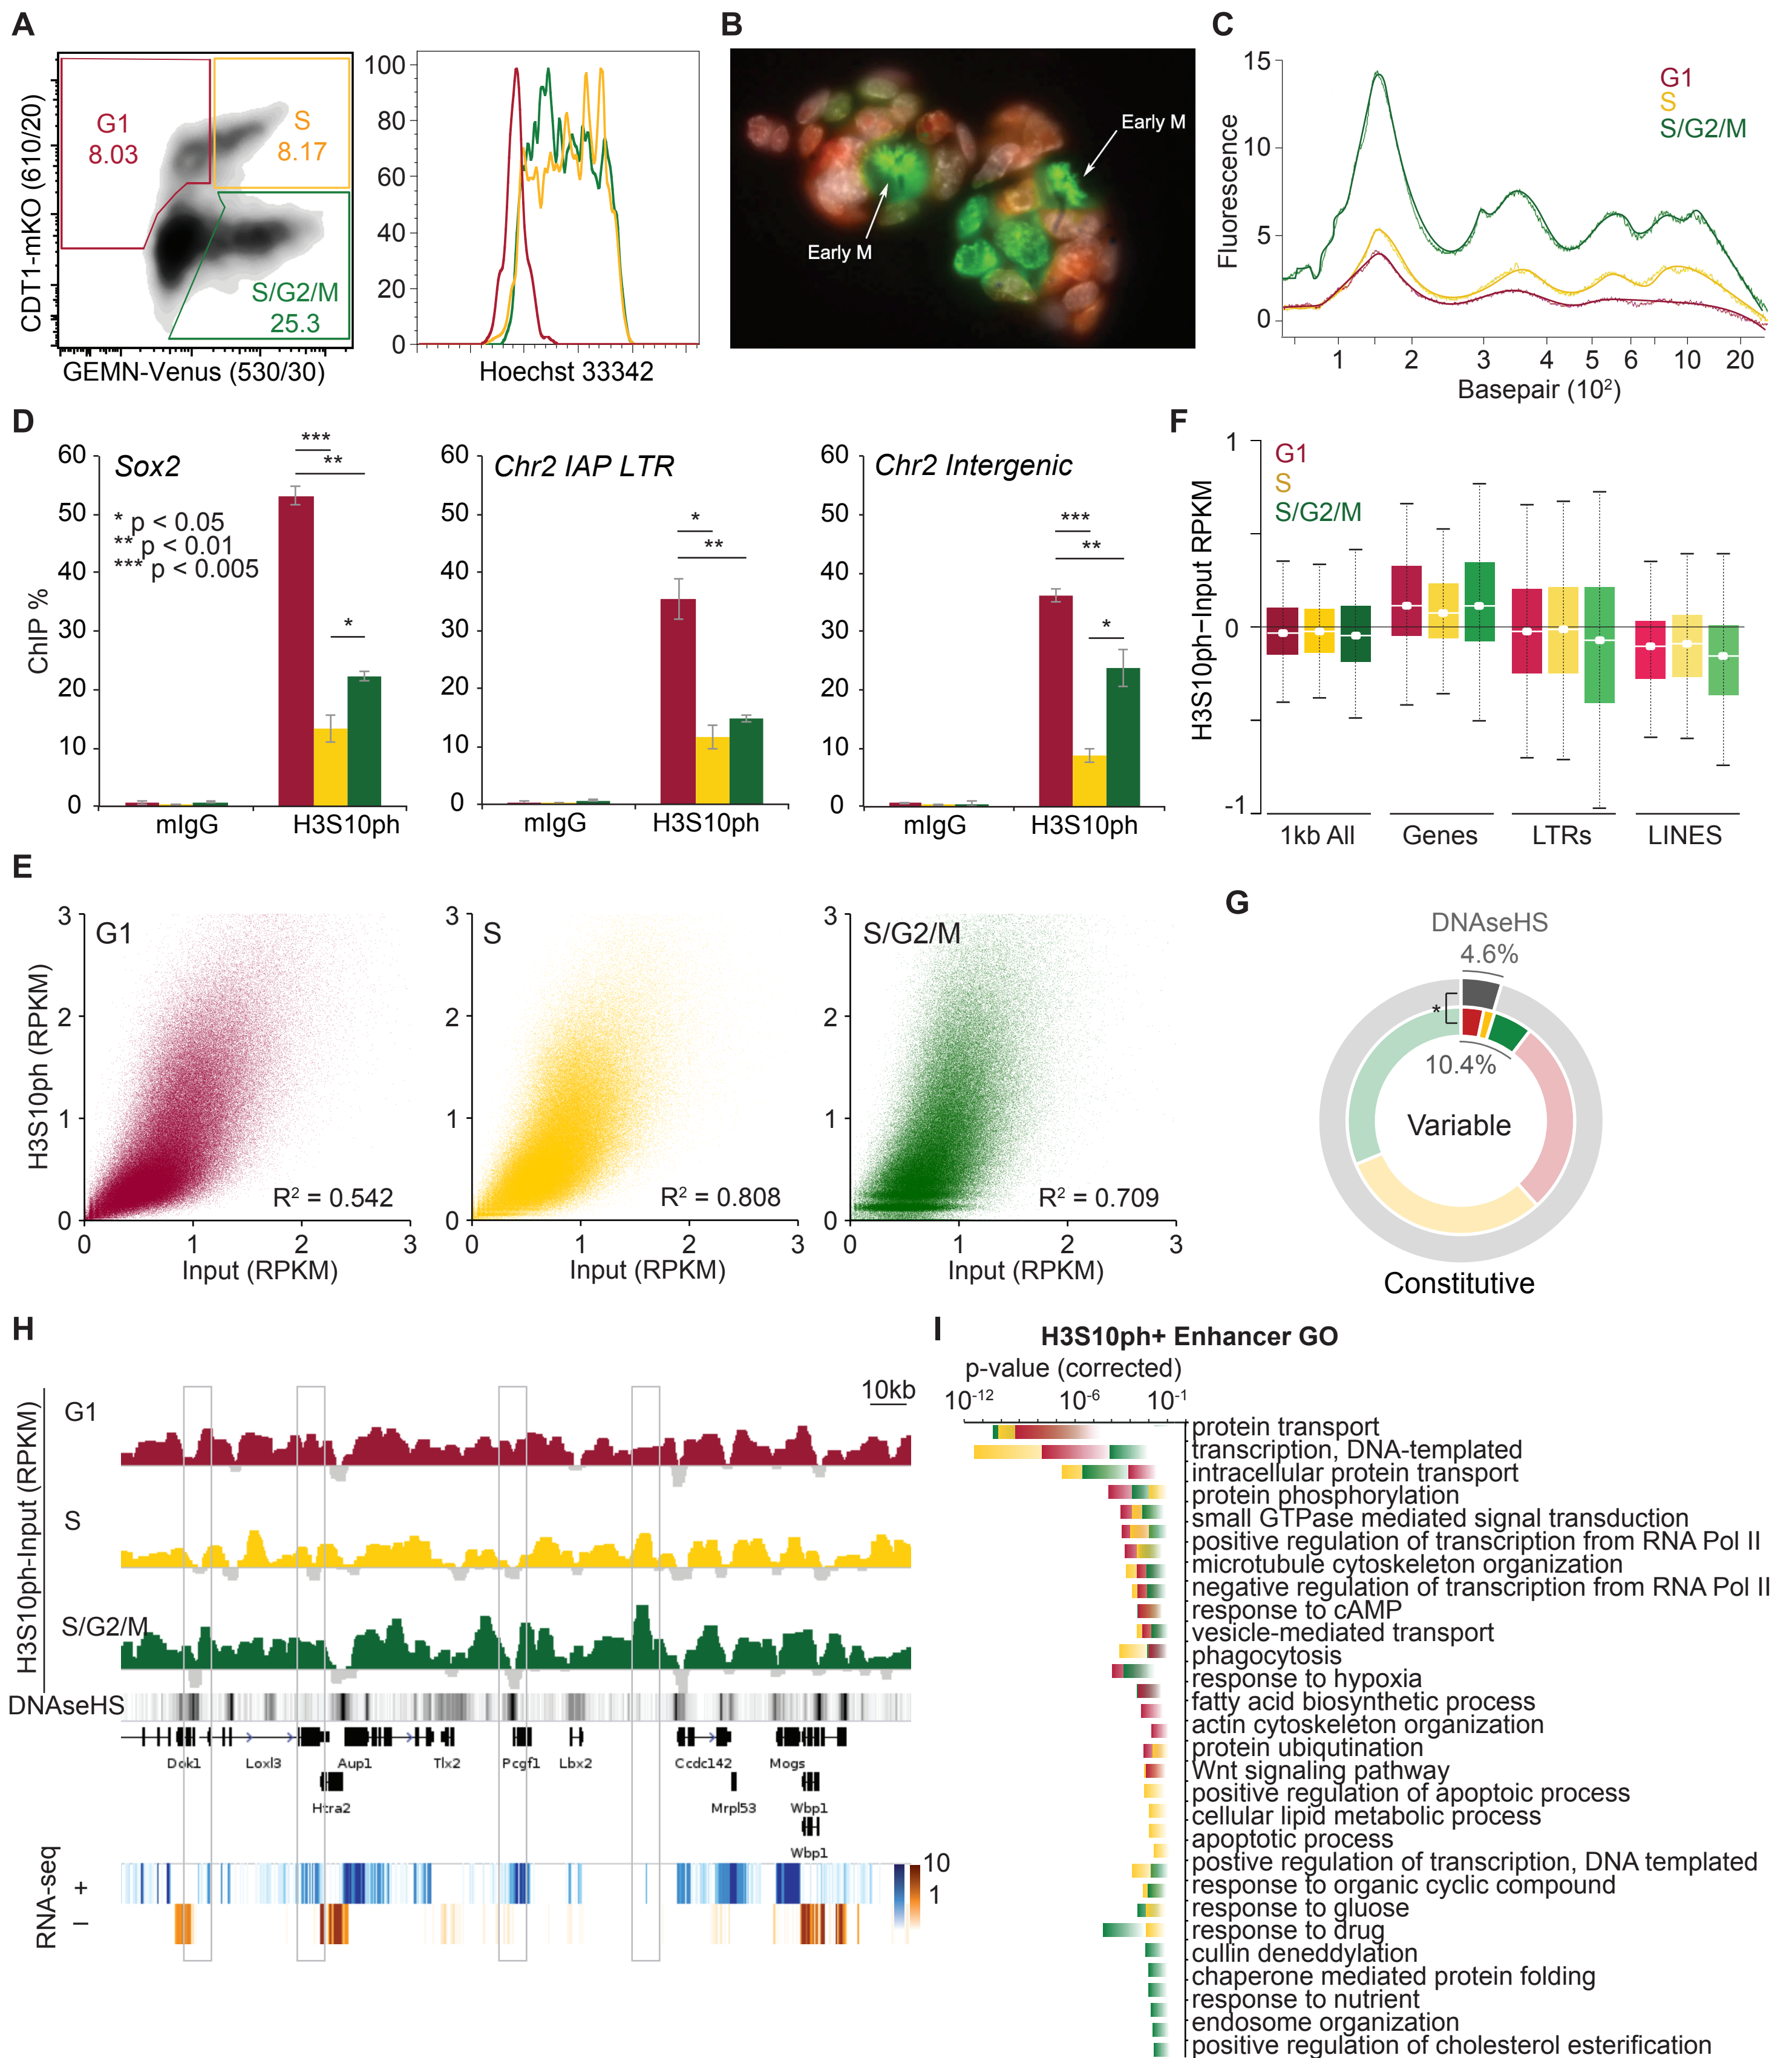

Supplement: supp_gr.224717.117_Supplemental_Fig_S1.pdf [file supp_gr.224717.117_Supplemental_Fig_S1.pdf]

## Supplemental Figure 2

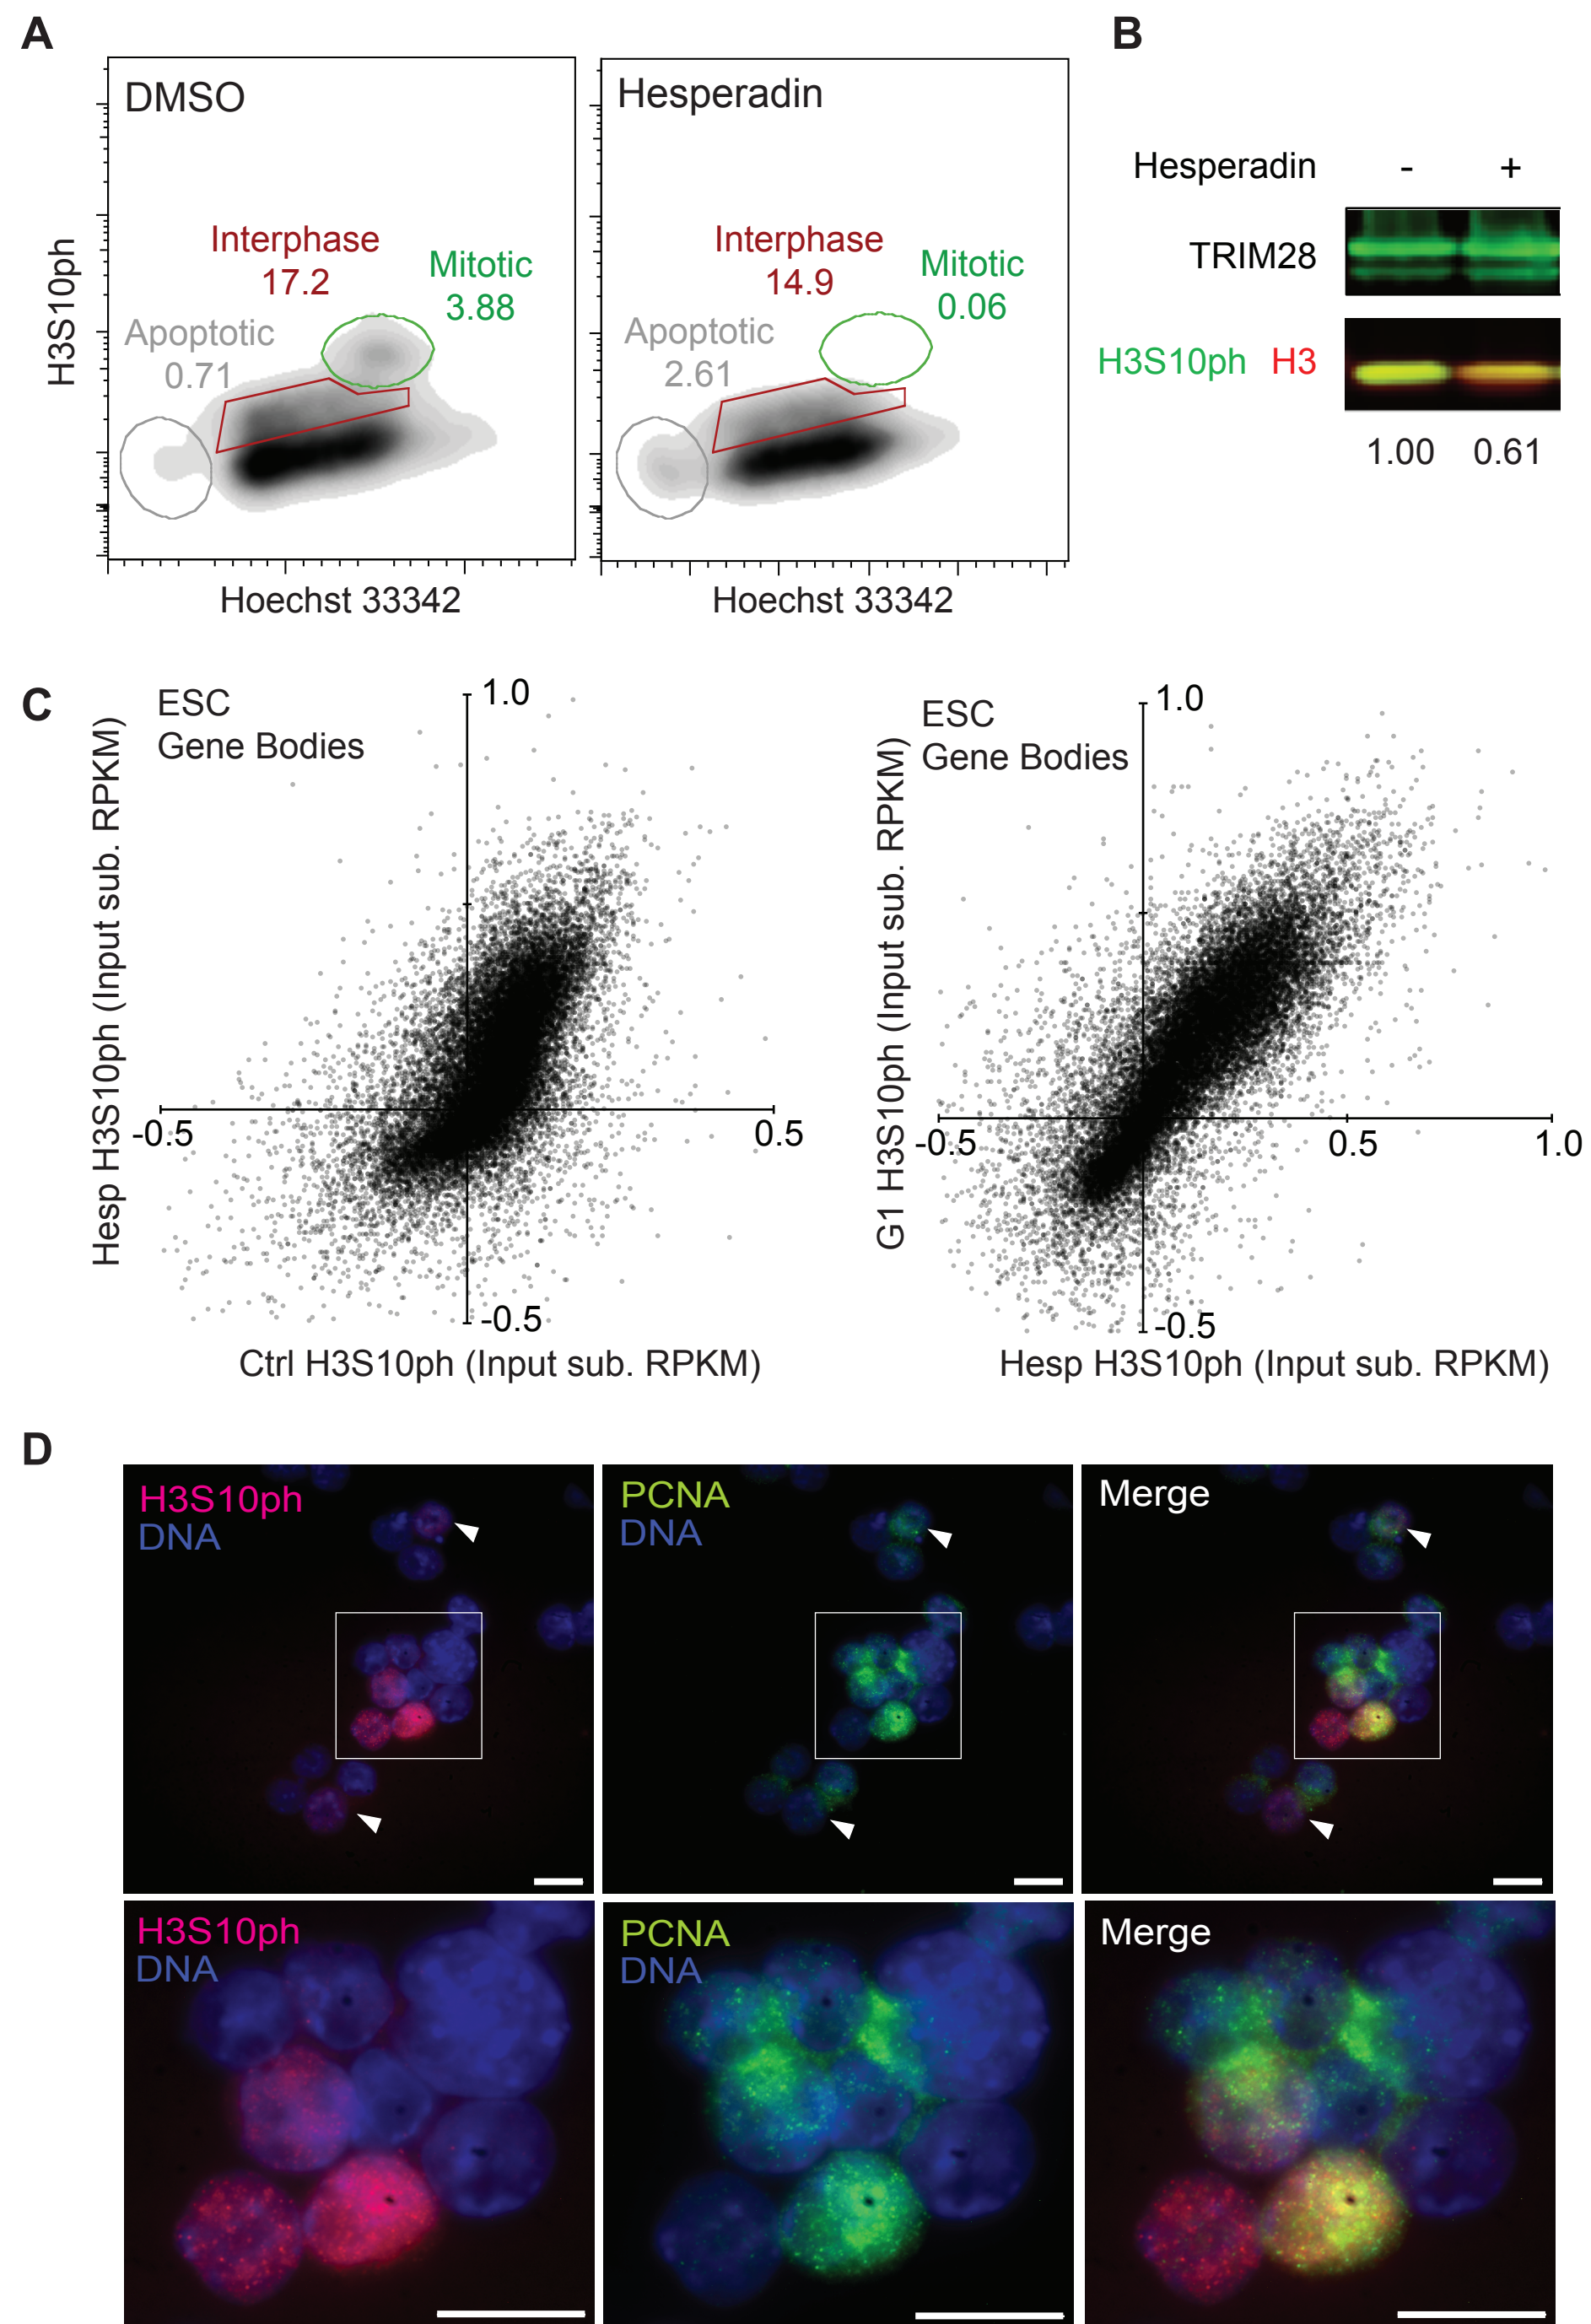

Supplement: supp_gr.224717.117_Supplemental_Fig_S2.pdf [file supp_gr.224717.117_Supplemental_Fig_S2.pdf]

## Supplemental Figure 3

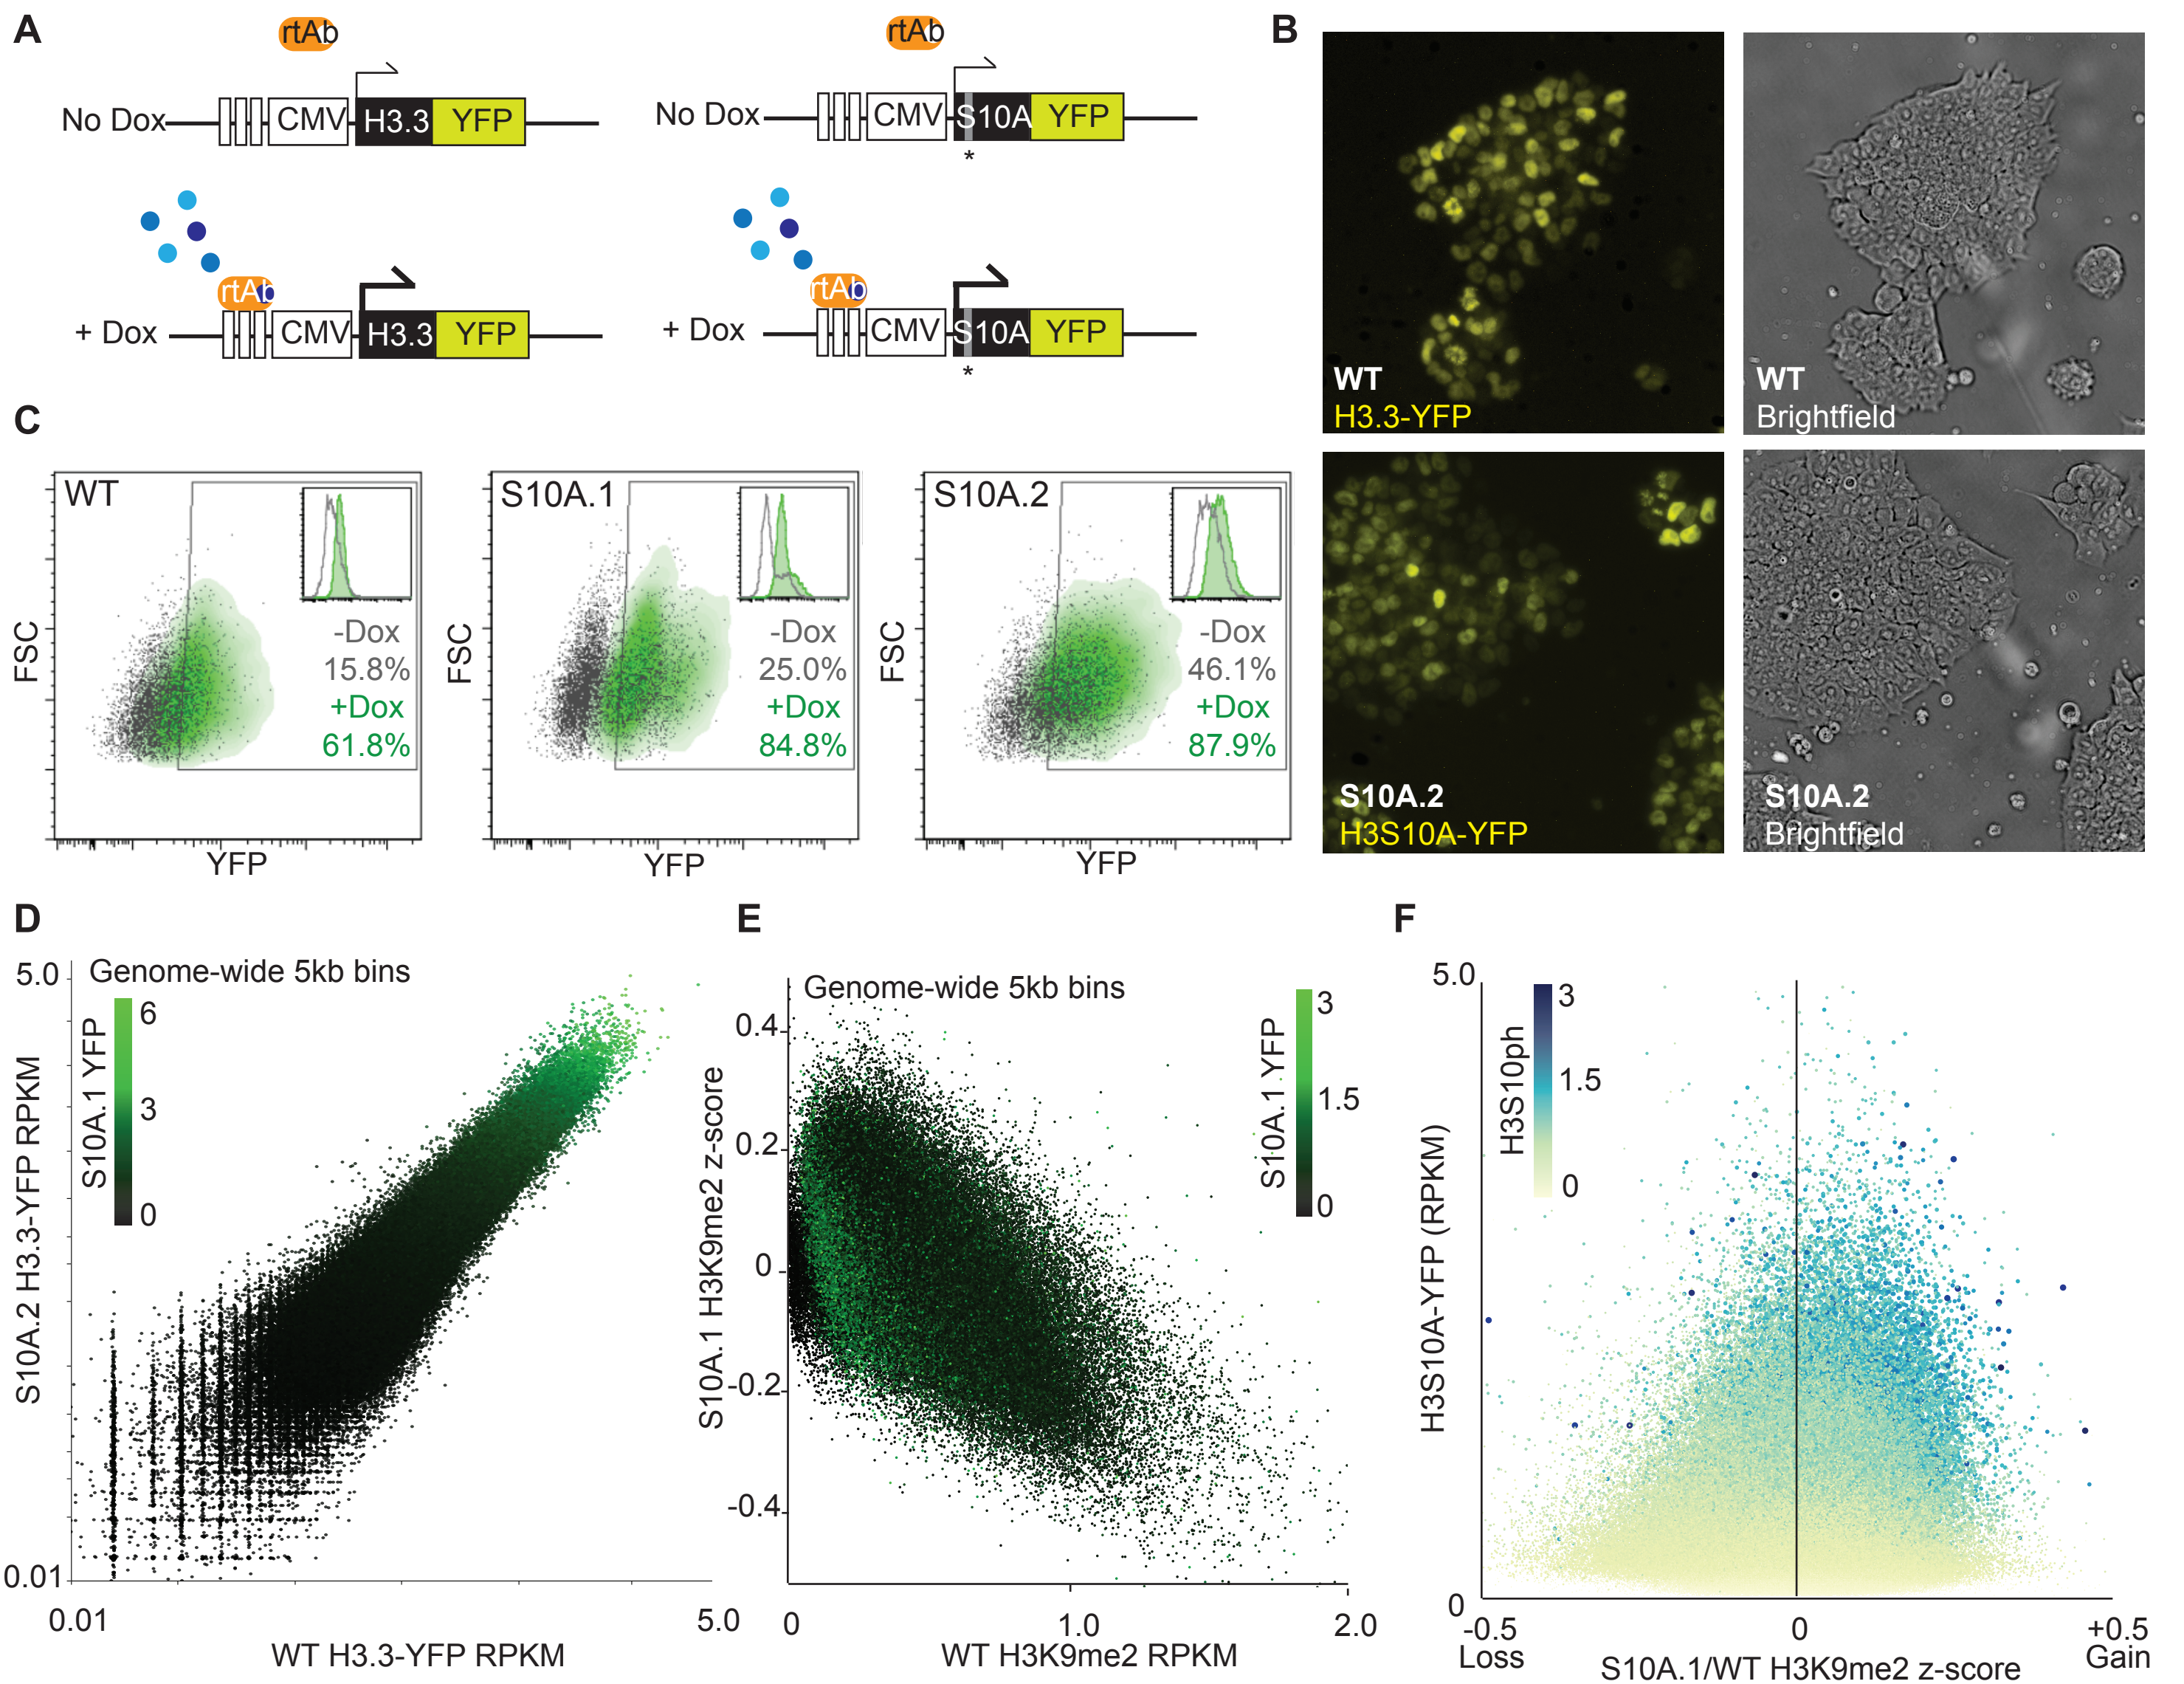

Supplement: supp_gr.224717.117_Supplemental_Fig_S3.pdf [file supp_gr.224717.117_Supplemental_Fig_S3.pdf]

# Supplemental Figure 4

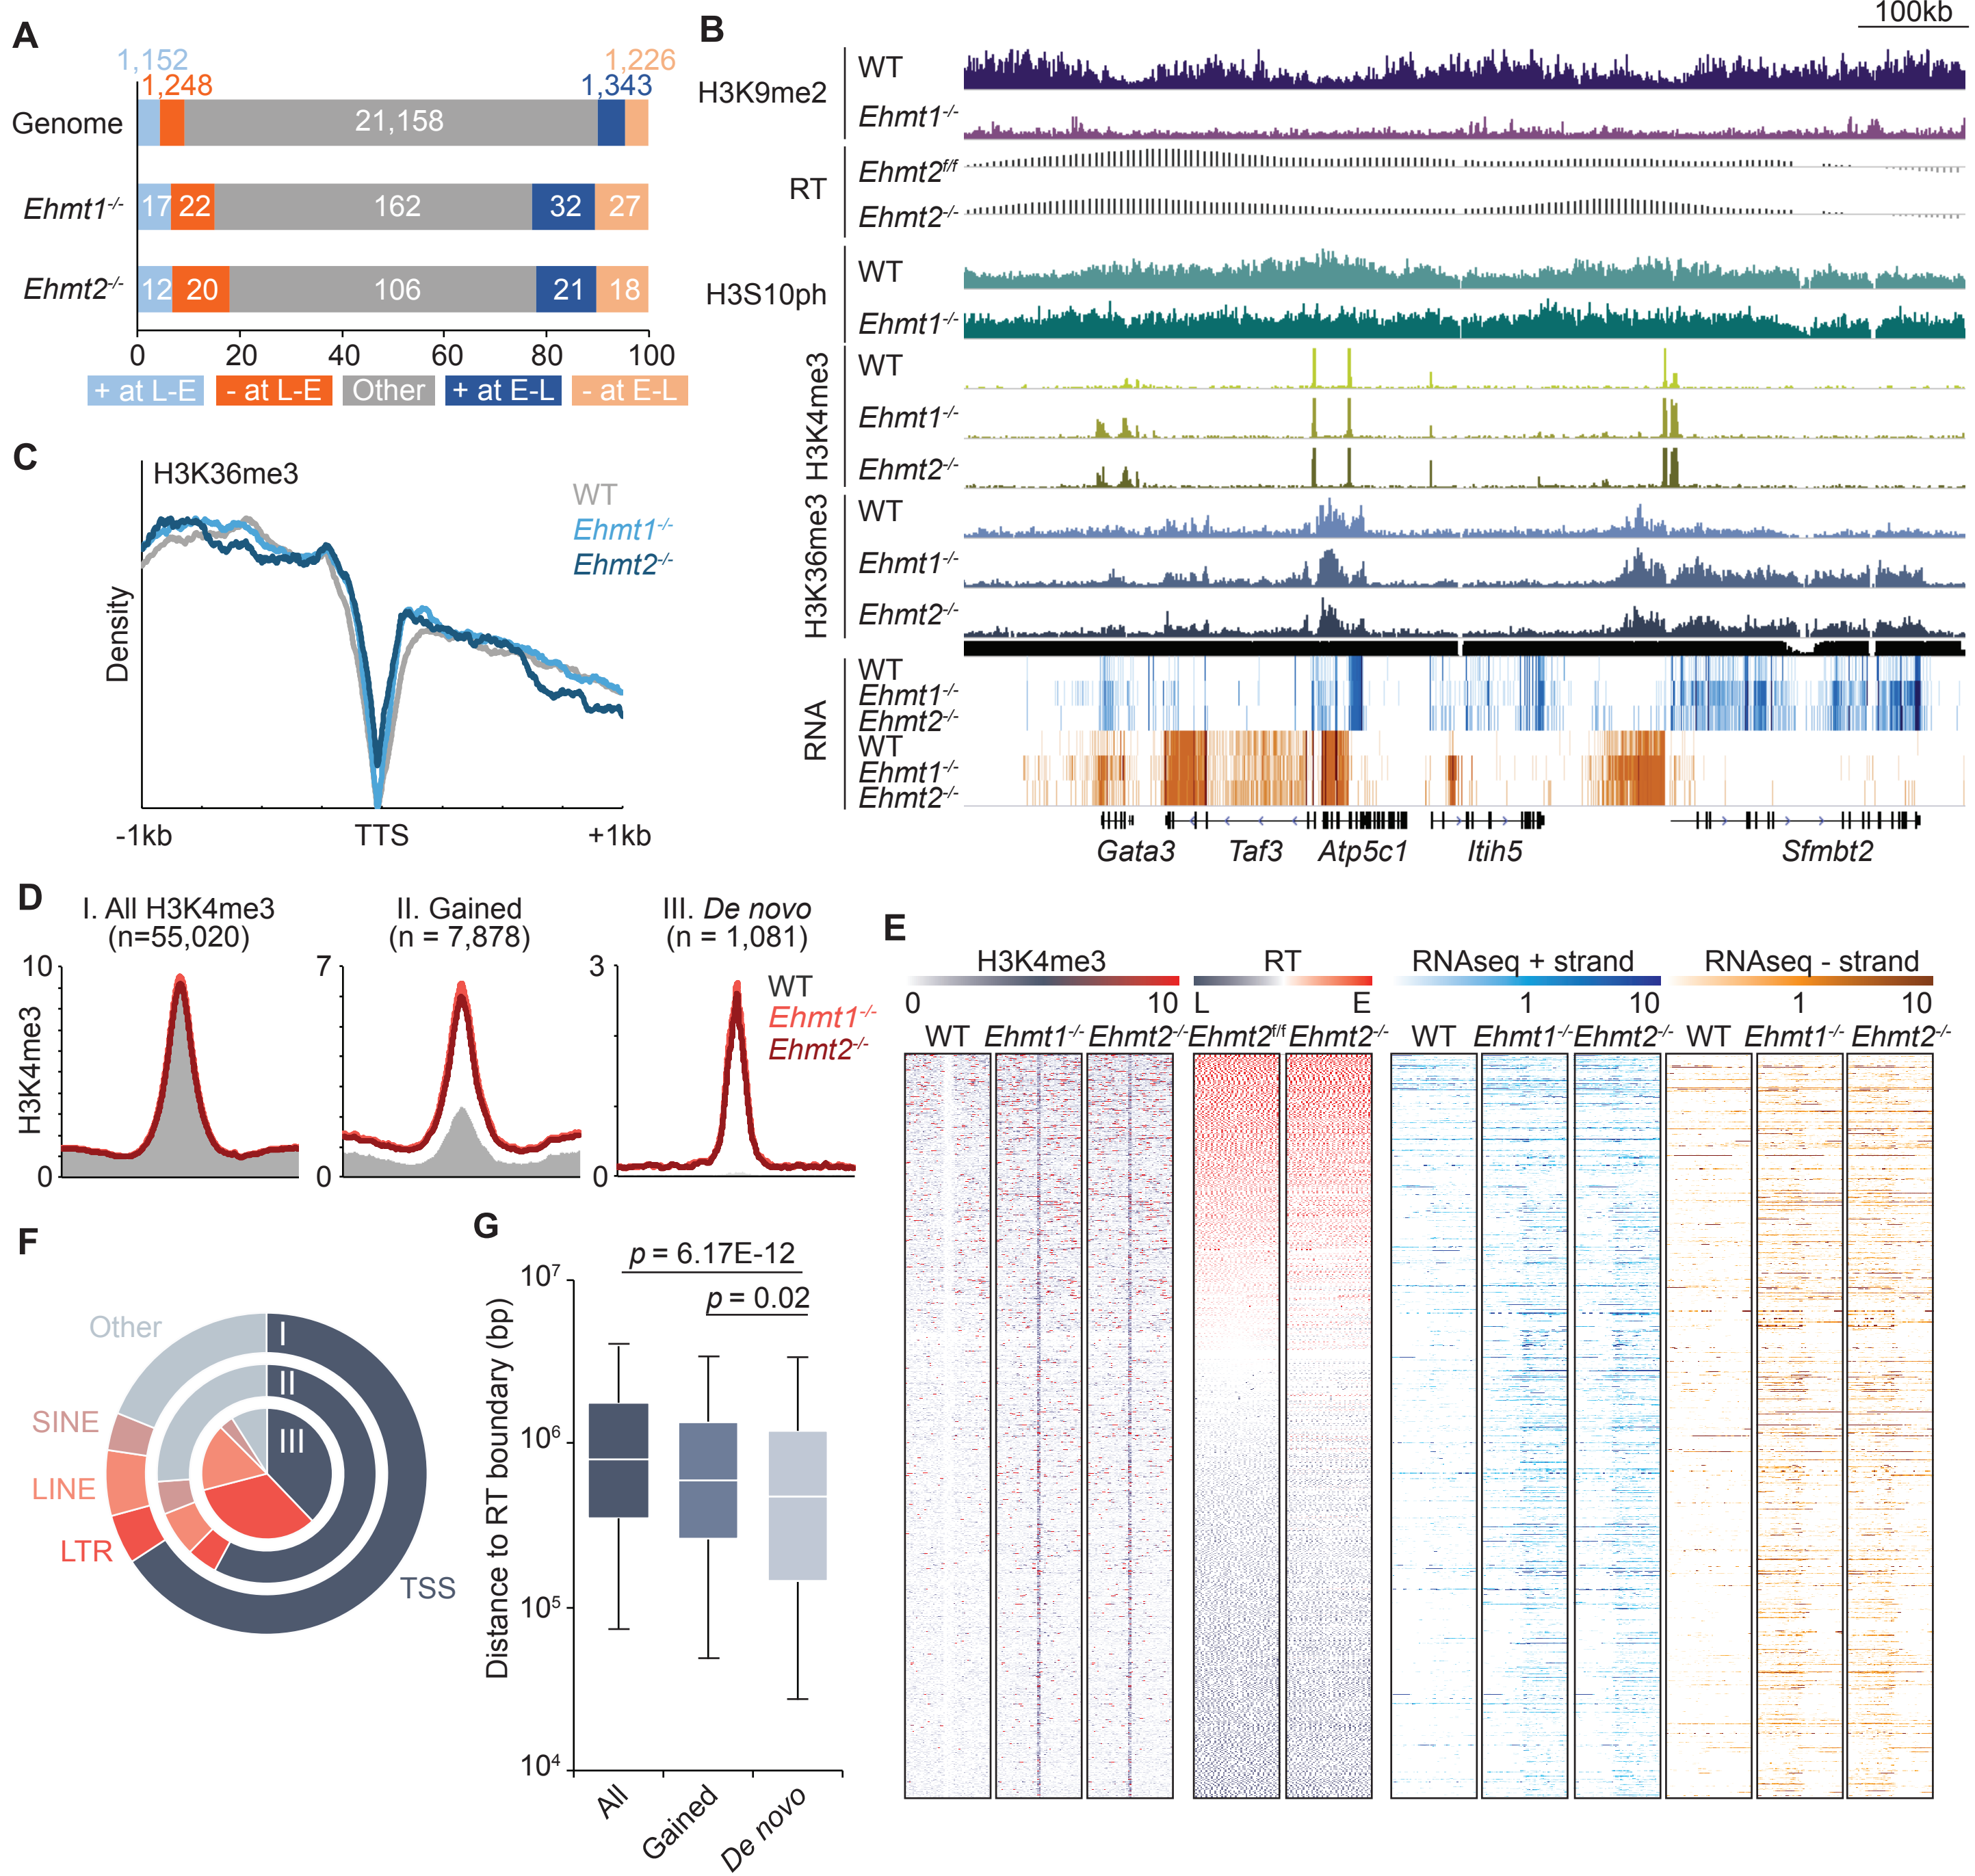

Supplement: supp_gr.224717.117_Supplemental_Fig_S4.pdf [file supp_gr.224717.117_Supplemental_Fig_S4.pdf]

# Supplemental Figure 5

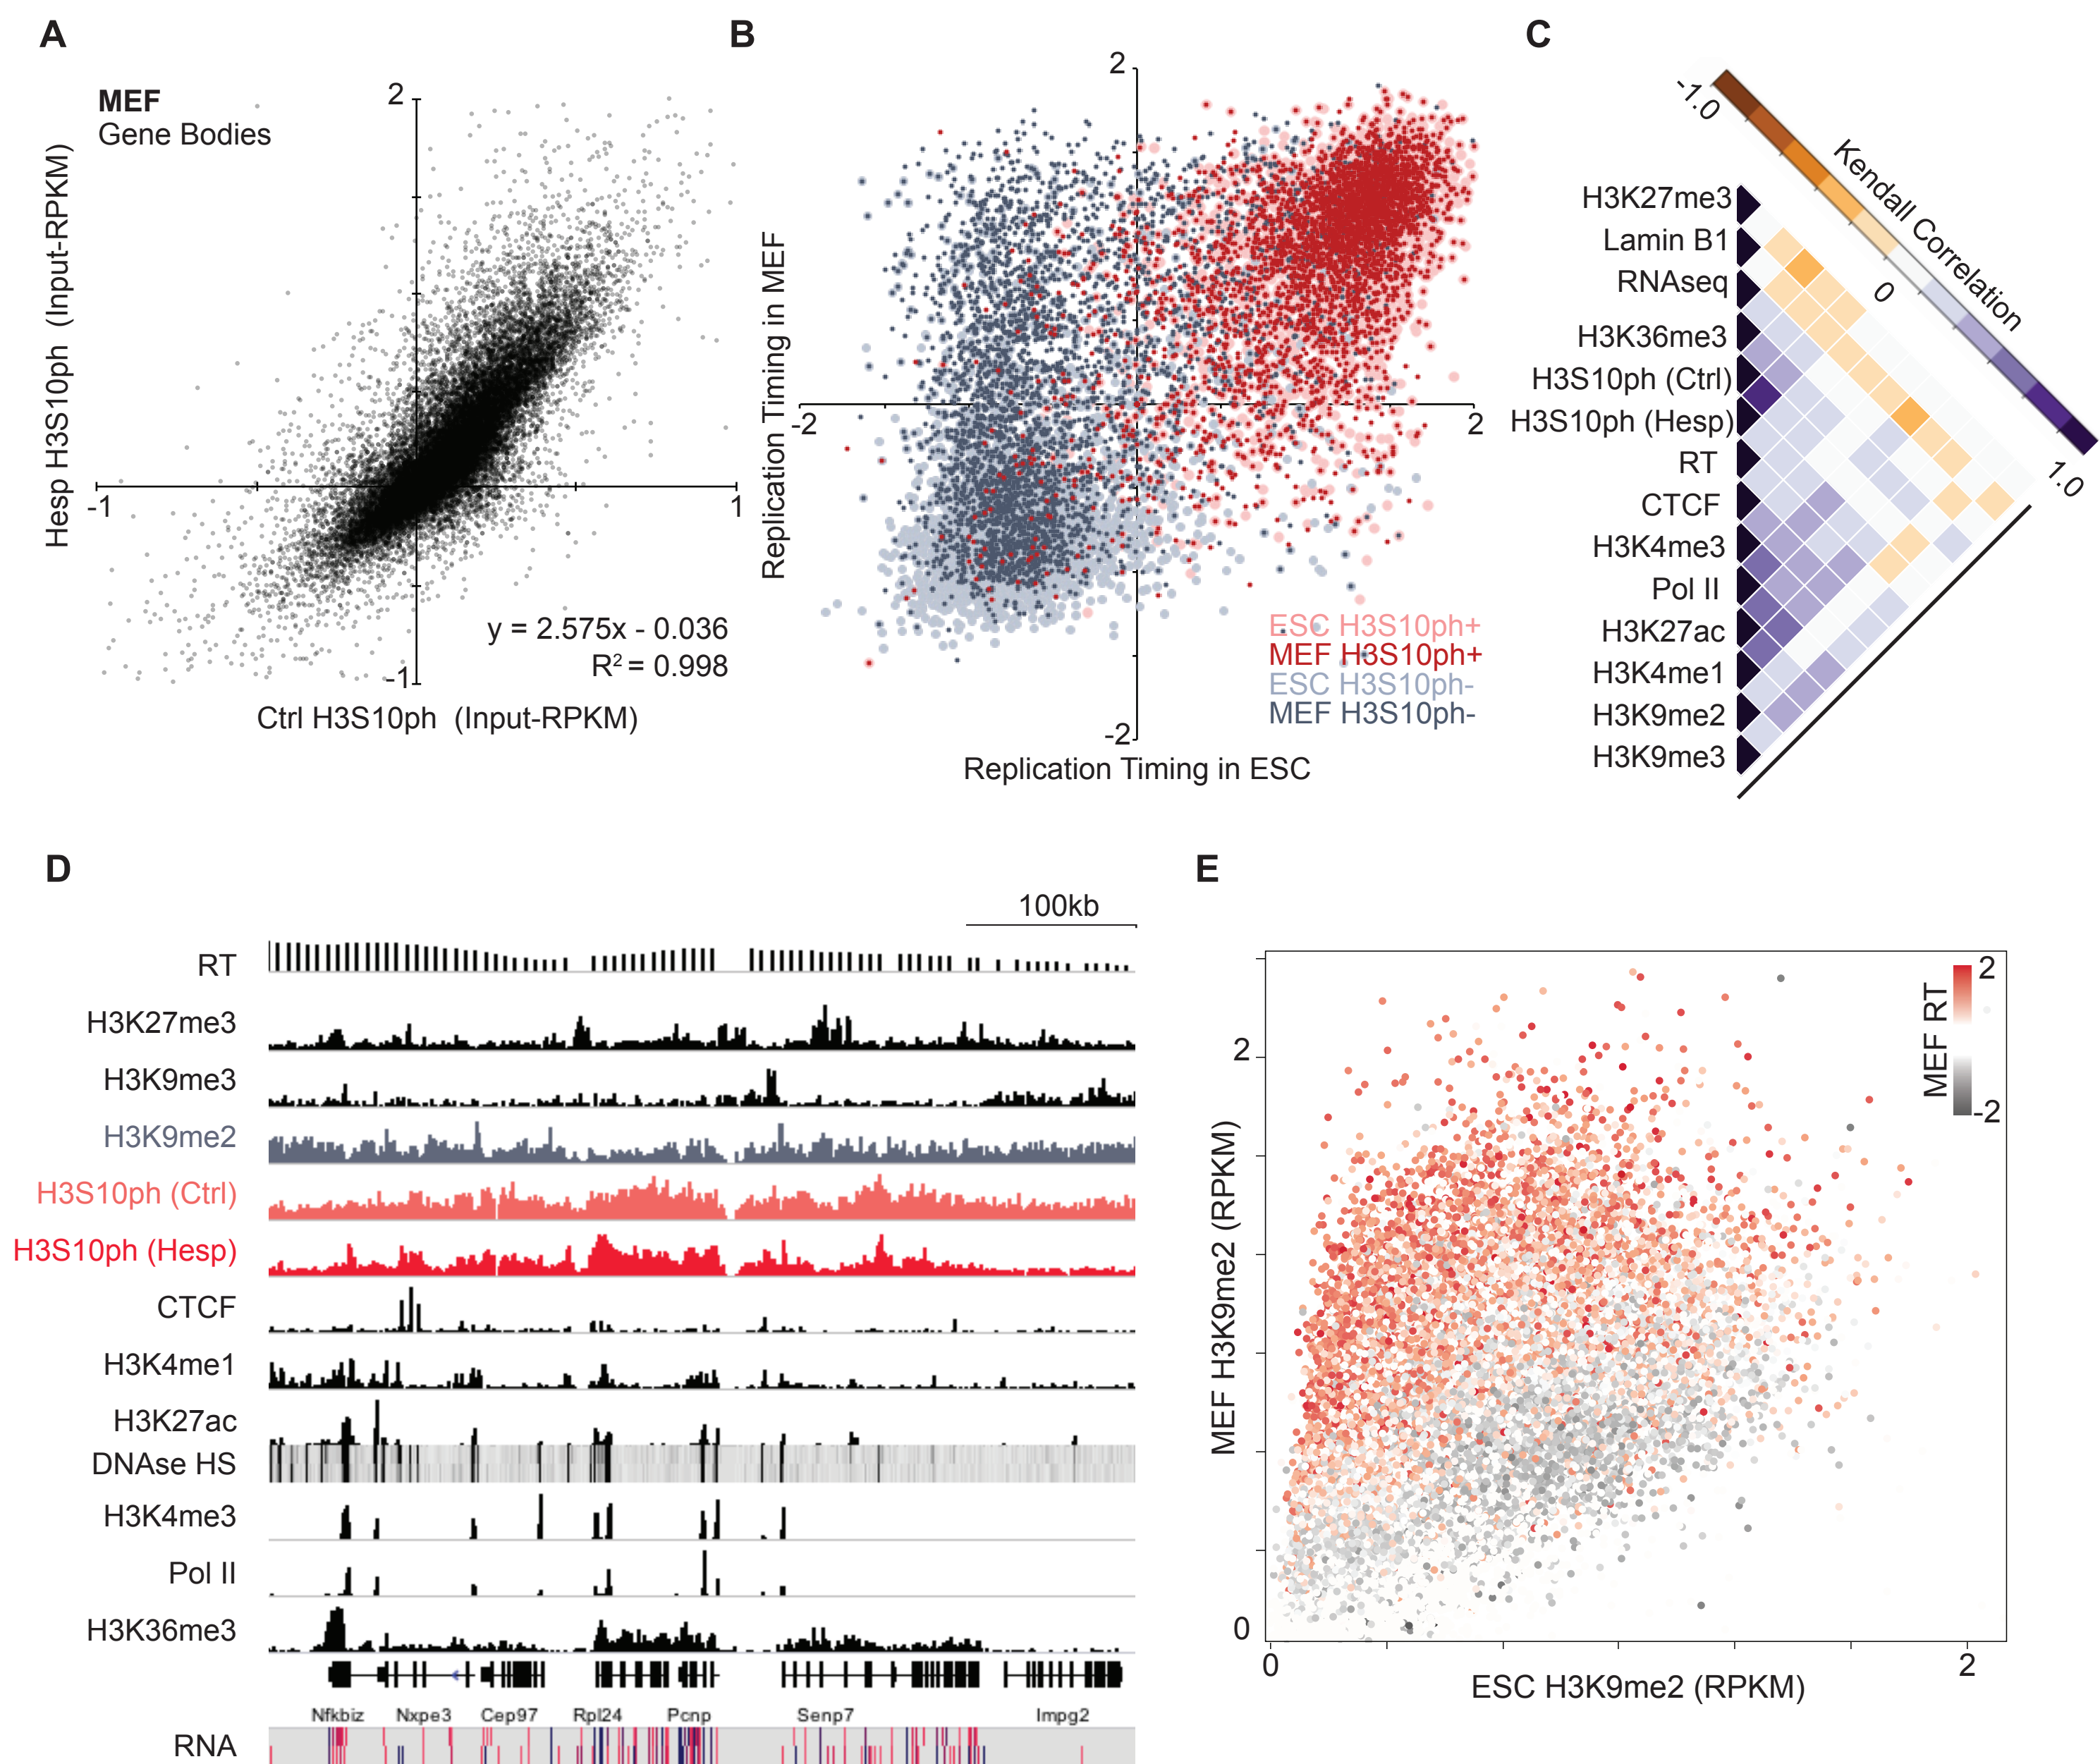

Supplement: supp_gr.224717.117_Supplemental_Fig_S5.pdf [file supp_gr.224717.117_Supplemental_Fig_S5.pdf]
